# Supplementary material for: Aged neutrophils form mitochondria-dependent vital NETs to promote breast cancer lung metastasis
Source: HighWire-hosted journal article supplement (doi:10.1136/jitc-2021-002875), 2021-10-01
Supplement: jitc-2021-002875supp006_data_supplement.pdf [file jitc-2021-002875supp006_data_supplement.pdf]

Table S1. Compared biochemical and molecular parameters associated with MDSC characterization functions in lung LDNs, HDNs, aged neutrophils and non-aged neutrophils

| Class                                                              | Parameters                                                         | Lung-LDN     | Lung-HDN     | Lung-Aged Neu | Lung-Non-Aged Neu | Detection technology |
|--------------------------------------------------------------------|--------------------------------------------------------------------|--------------|--------------|---------------|-------------------|----------------------|
| Immune response                                                    | Inhibition of T cell proliferation                                 | ++++         | +            | ++            | ++                | Flow                 |
|                                                                    | Inhibition of IFN- $\gamma$ production by CD8 <sup>+</sup> T cells | +++          | -            | -             | ++                | Flow                 |
|                                                                    | Inhibition of IL-2 production by CD4 <sup>+</sup> T cells          | +++          | +            | +             | +                 | Flow                 |
| Transcription factors and apoptotic regulators                     | $\downarrow$ $\kappa$ IRF8*                                        | $\downarrow$ | $\uparrow$   | -             | -                 | Flow                 |
|                                                                    | Phospho-STAT3*                                                     | $\uparrow$   | -            | -             | -                 | Flow                 |
|                                                                    | cEBP/ $\beta$ *                                                    | $\uparrow$   | -            | $\uparrow$    | -                 | RT-PCR               |
|                                                                    | S100A8/9*                                                          | $\uparrow$   | $\downarrow$ | $\downarrow$  | -                 | RT-PCR               |
|                                                                    | RB                                                                 | -            | -            | $\uparrow$    | -                 | RT-PCR               |
|                                                                    | Phospho-STAT5                                                      | -            | -            | $\downarrow$  | -                 | Flow                 |
|                                                                    | ROR/RORC1                                                          | $\uparrow$   | -            | $\uparrow$    | -                 | Flow                 |
|                                                                    | sXBP, CHOP                                                         | -            | $\downarrow$ | $\uparrow$    | -                 | RT-PCR               |
| Genes and molecules contributing to the immune-regulatory activity | ARG1*                                                              | $\uparrow$   | $\uparrow$   | $\downarrow$  | -                 | Functional activity  |
|                                                                    | NOS2/NO*                                                           | -            | -            | -             | -                 | Functional activity  |
|                                                                    | NOX2/ROS*                                                          | $\uparrow$   | $\downarrow$ | $\downarrow$  | -                 | Flow                 |
|                                                                    | PNT/RNS*                                                           | $\uparrow$   | -            | $\downarrow$  | -                 | Functional activity  |
|                                                                    | VEGF                                                               | -            | $\uparrow$   | $\uparrow$    | -                 | RT-PCR               |
|                                                                    | PGE2                                                               | $\uparrow$   | -            | -             | -                 | ELISA                |
| Cytokines and receptors                                            | PD-L1                                                              | -            | -            | $\uparrow$    | -                 | RT-PCR               |
|                                                                    | IL-10*                                                             | -            | -            | $\uparrow$    | -                 | RT-PCR               |
|                                                                    | TGF- $\beta$ *                                                     | $\uparrow$   | -            | $\uparrow$    | -                 | RT-PCR               |
|                                                                    | IL-4R (CD124)*                                                     | $\uparrow$   | -            | $\downarrow$  | -                 | RT-PCR               |

\*Parameters crucial for MDSC biology and, thus, for their identification.
