# Supplementary material for: Aged neutrophils form mitochondria-dependent vital NETs to promote breast cancer lung metastasis
Source: HighWire-hosted journal article supplement (doi:10.1136/jitc-2021-002875), 2021-10-01
Supplement: jitc-2021-002875supp007_data_supplement.pdf [file jitc-2021-002875supp007_data_supplement.pdf]

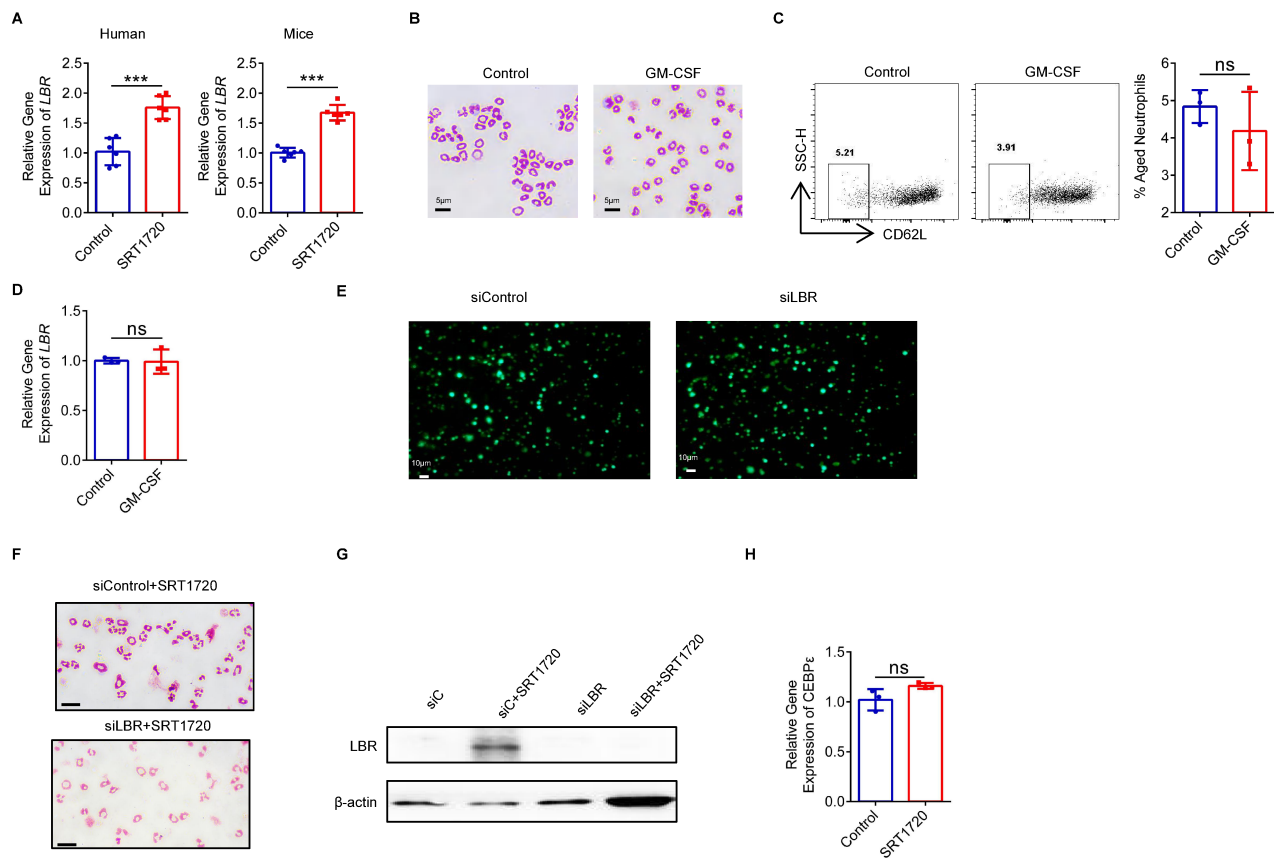

**Supplemental figure4. The SIRT1-C/EBPε-LBR axis regulates the over-segmentation of Naged.**

(A) Expression of the LBR mRNA in neutrophils from the PB of patients with breast fibroadenoma and the BM of naïve mice treated with SRT1720 for 4 hours *in vitro*. (B to E) Representative images of Giemsa staining (B), flow cytometry analysis (C) and the mRNA expression of the LBR (D) in neutrophils from the BM of naïve mice treated with GM-CSF for 24 hours *in vitro*. (E) Representative images of neutrophils transfected with the siControl or siLBR plasmid by electroporation and incubated with GM-CSF for 24 h. (F and G) Representative images of Giemsa staining (F) and validation of the level of the LBR protein (G) in siControl- and siLBR-transfected neutrophils treated with SRT1720. siC, siControl. (H) Expression of the C/EBPε mRNA in neutrophils from the BM of naïve mice treated with SRT1720 for 4 hours *in vitro*. Data are presented as the means  $\pm$  SD from one representative experiment. Statistical analysis was performed by two-tailed unpaired Student's t test (A, C, D, H). ns, not significant, \* $p$ <0.05, \*\* $p$ <0.01, and \*\*\* $p$ <0.001.
