# Supplementary material for: Aged neutrophils form mitochondria-dependent vital NETs to promote breast cancer lung metastasis
Source: PubMed Central journal article supplement — J Immunother Cancer. 2021 Oct 24;9(10):e002875. doi: 10.1136/jitc-2021-002875 (PMC8559246; doi:10.1136/jitc-2021-002875), 2021-10-24
Supplement: jitc-2021-002875supp011.pdf [file jitc-2021-002875supp011.pdf]

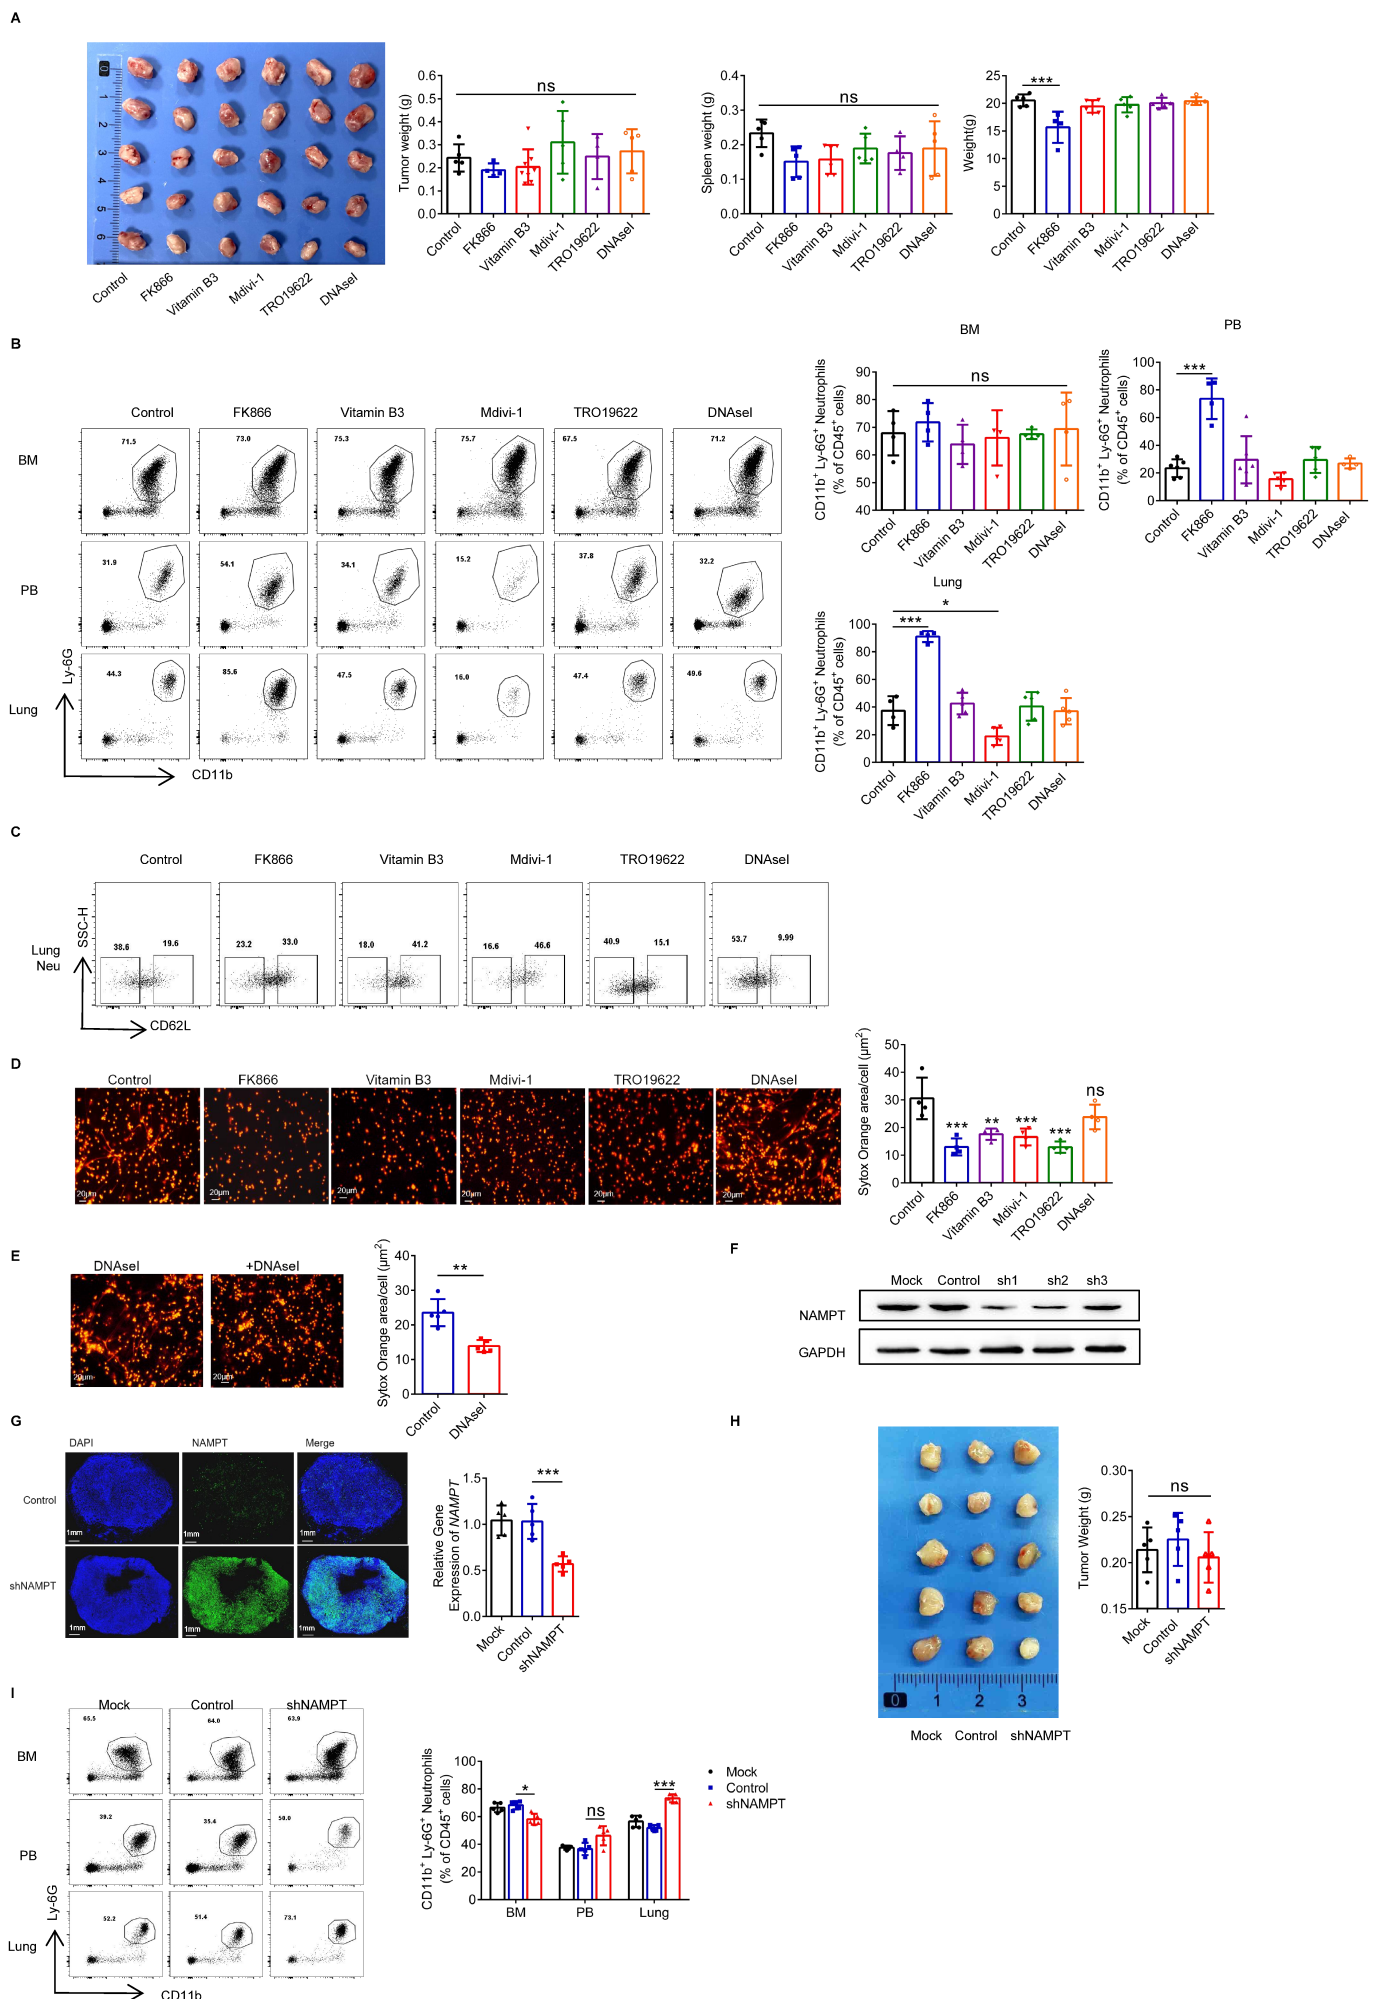

**Supplemental figure8. Tumor-secreted NAMPT is responsible for the expression of SIRT1 on Naged, promoting pre-metastatic niche formation.**

(A) Representative image, tumor weights of primary tumors, Body weight, and Spleen weight measured after the administration of multiple interventions for 2 weeks. (B) Flow analysis (upper panel) and quantification (lower panel) of neutrophils in the BM, PB and lung of tumor-bearing mice after the administration of multiple interventions for 2 weeks. (C) Flow analysis of aged neutrophils in the lung of tumor-bearing mice after the administration of multiple interventions for 2 weeks. (D) Immunofluorescence staining and quantification of NETs generated by neutrophils in the lungs of tumor-bearing mice after the administration of multiple interventions for 2 weeks. Compared to the Control group. (E) Image of NETs formed by neutrophils in the lungs of tumor-bearing mice after the administration of DNase I intervention for 2 weeks, and the addition of DNase I *in vitro*. (F) Verification of the level of the NAMPT protein in different tumor cell lines. Mock, untreated 4T1 cells. sh1-3, NAMPT knockout in 4T1 cells by shRNAs targeting different regions. (G) Representative images of NAMPT staining (left panel) and mRNA expression of the NAMPT (right panel) in primary tumors from 2-week tumor-bearing mice inoculated with mock-, Control- or sh1-4T1 cells. (H) Representative image (left panel) and tumor weights (right panel) of primary tumors from 2-week tumor-bearing mice inoculated with mock-, Control- or sh1-4T1 cells. (I) Flow analysis (left panel) and quantification (right panel) of neutrophils in the BM, PB and lung of 2-week tumor-bearing mice inoculated with different tumor cell lines. Data are presented as the means  $\pm$  SD of one representative experiment. Similar results were obtained from three independent experiments, unless indicated otherwise. Statistical analysis was performed by two-tailed unpaired Student's t test (E) and one-way ANOVA (A, B, D, G, H and I). ns, not significant, \* $p$ <0.05, \*\* $p$ <0.01, and \*\*\* $p$ <0.001.
