# Supplementary material for: Aged neutrophils form mitochondria-dependent vital NETs to promote breast cancer lung metastasis
Source: HighWire-hosted journal article supplement (doi:10.1136/jitc-2021-002875), 2021-10-01
Supplement: jitc-2021-002875supp011_data_supplement.pdf [file jitc-2021-002875supp011_data_supplement.pdf]

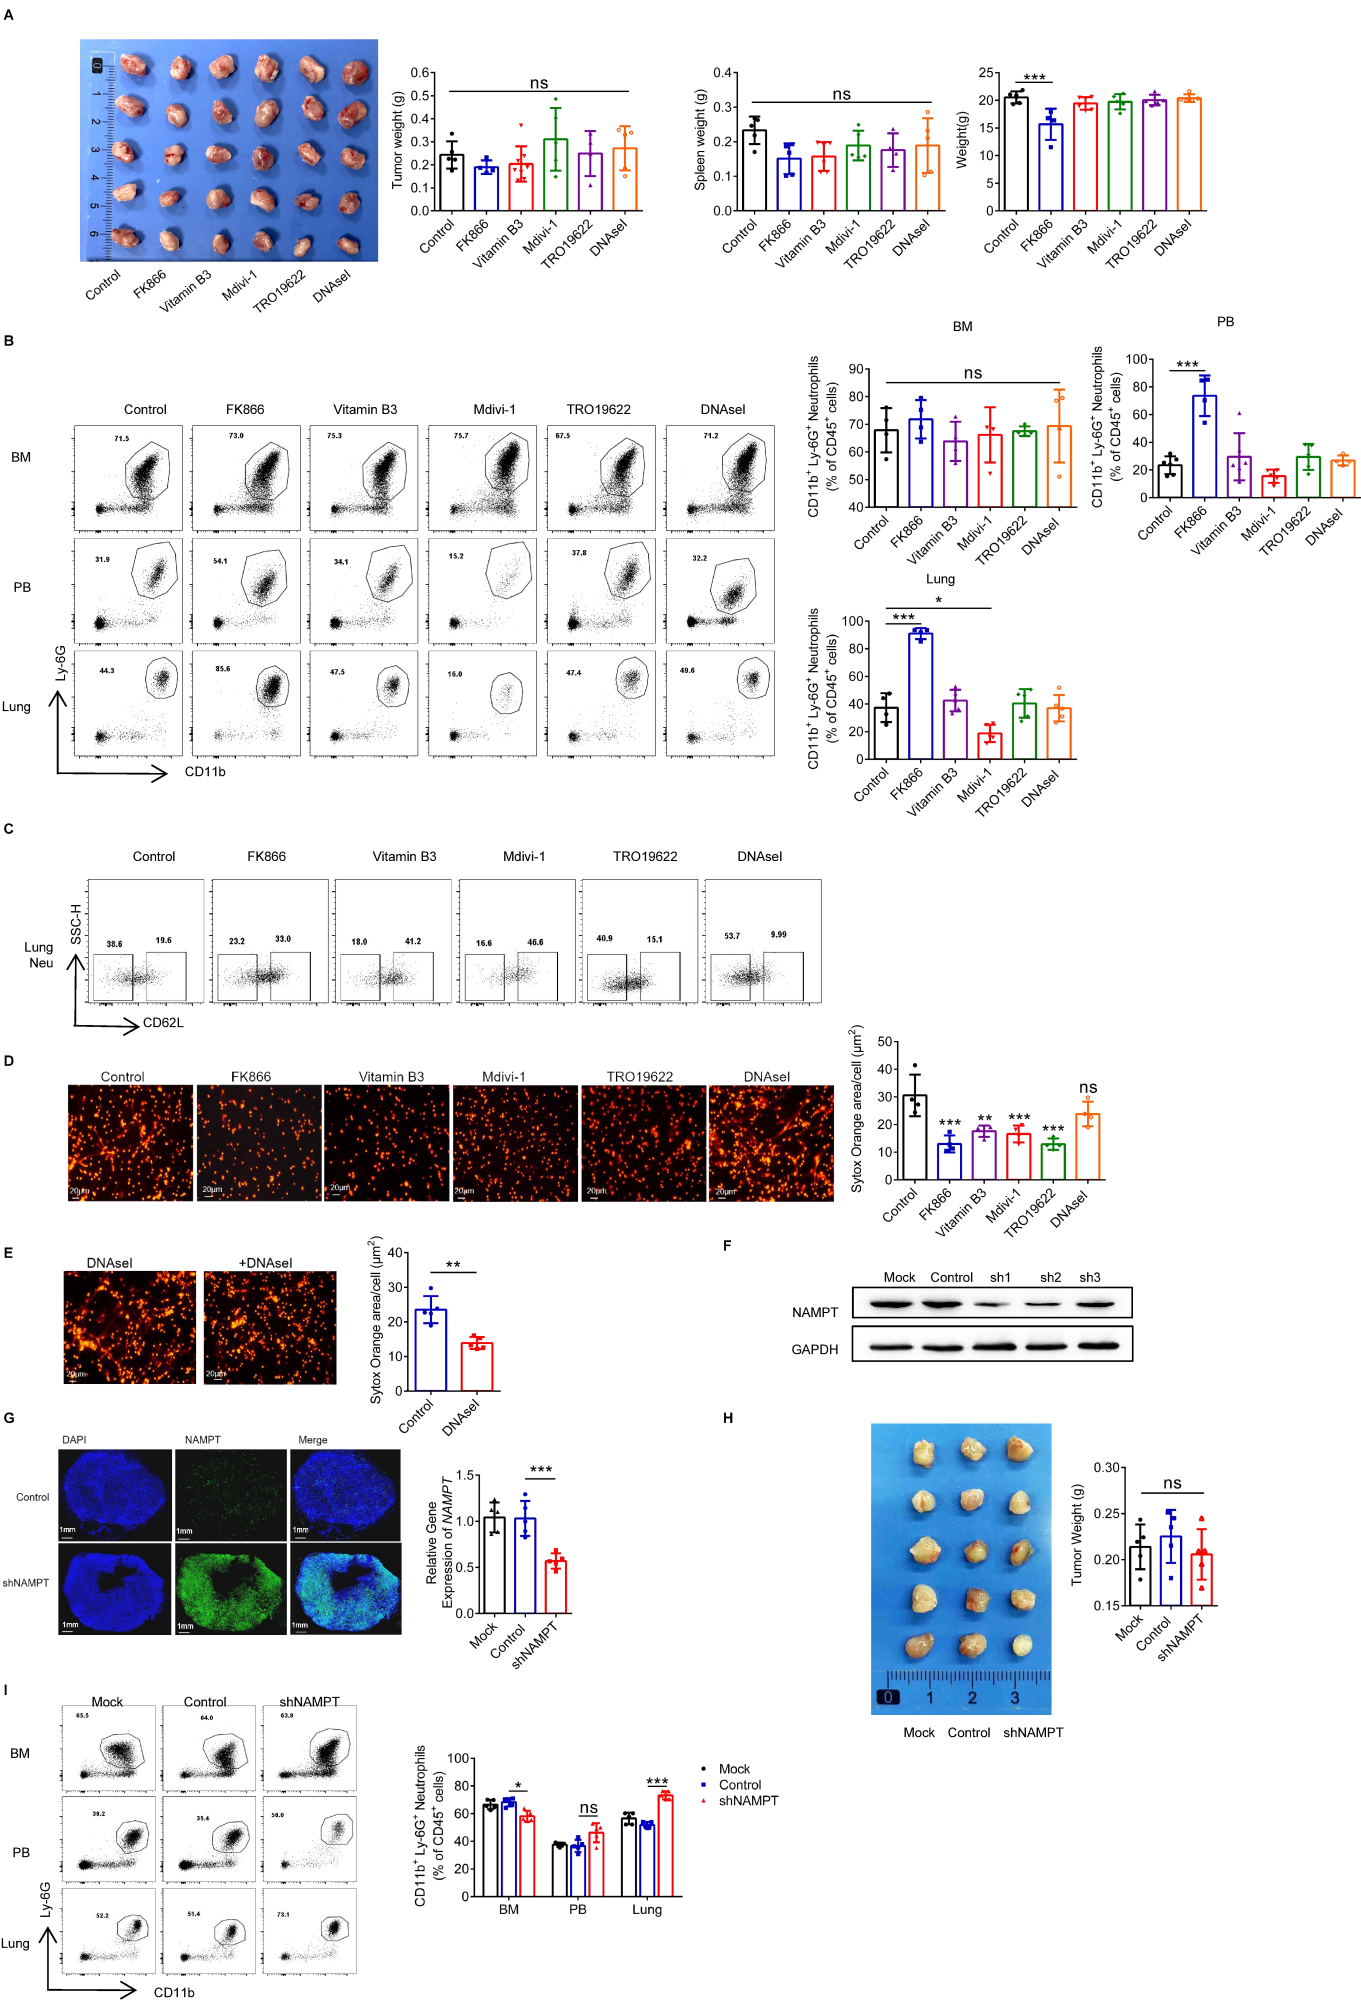

**Supplemental figure8. Tumor-secreted NAMPT is responsible for the expression of SIRT1 on Naged, promoting pre-metastatic niche formation.**

**(A)** Representative image, tumor weights of primary tumors, Body weight, and Spleen weight measured after the administration of multiple interventions for 2 weeks. **(B)** Flow analysis (upper panel) and quantification (lower panel) of neutrophils in the BM, PB and lung of tumor-bearing mice after the administration of multiple interventions for 2 weeks. **(C)** Flow analysis of aged neutrophils in the lung of tumor-bearing mice after the administration of multiple interventions for 2 weeks. **(D)** Immunofluorescence staining and quantification of NETs generated by neutrophils in the lungs of tumor-bearing mice after the administration of multiple interventions for 2 weeks. Compared to the Control group. **(E)** Image of NETs formed by neutrophils in the lungs of tumor-bearing mice after the administration of DNase I intervention for 2 weeks, and the addition of DNase I *in vitro*. **(F)** Verification of the level of the NAMPT protein in different tumor cell lines. Mock, untreated 4T1 cells. sh1-3, NAMPT knockout in 4T1 cells by shRNAs targeting different regions. **(G)** Representative images of NAMPT staining (left panel) and mRNA expression of the NAMPT (right panel) in primary tumors from 2-week tumor-bearing mice inoculated with mock-, Control- or sh1-4T1 cells. **(H)** Representative image (left panel) and tumor weights (right panel) of primary tumors from 2-week tumor-bearing mice inoculated with mock-, Control- or sh1-4T1 cells. **(I)** Flow analysis (left panel) and quantification (right panel) of neutrophils in the BM, PB and lung of 2-week tumor-bearing mice inoculated with different tumor cell lines. Data are presented as the means  $\pm$  SD of one representative experiment. Similar results were obtained from three independent experiments, unless indicated otherwise. Statistical analysis was performed by two-tailed unpaired Student's t test (E) and one-way ANOVA (A, B, D, G, H and I). ns, not significant, \* $p$ <0.05, \*\* $p$ <0.01, and \*\*\* $p$ <0.001.
