# Supplementary material for: Aged neutrophils form mitochondria-dependent vital NETs to promote breast cancer lung metastasis
Source: PubMed Central journal article supplement — J Immunother Cancer. 2021 Oct 24;9(10):e002875. doi: 10.1136/jitc-2021-002875 (PMC8559246; doi:10.1136/jitc-2021-002875), 2021-10-24
Supplement: jitc-2021-002875supp013.pdf [file jitc-2021-002875supp013.pdf]

**Table S2. Clinico-pathological characteristics of patients included in this study (Fig. 1i, 1j and 7h)**

| Patient ID | Sex | Age(y) | Diagnosis     | ER | PR | HER2 | Ki67 | Histological classification | T stage | N stage | M stage |
|------------|-----|--------|---------------|----|----|------|------|-----------------------------|---------|---------|---------|
| BC81       | F   | 60     | breast cancer | -  | -  | +    | 50%  | HER2                        | 1       | 1       | 0       |
| BC82       | F   | 63     | breast cancer | +  | +  | +    | 10%  | Luminal B                   | 1       | 0       | 0       |
| BC83       | F   | 56     | breast cancer | +  | +  | -    | 5%   | Luminal A                   | 1       | 1       | 0       |
| BC84       | F   | 34     | breast cancer | +  | +  | -    | 80%  | Luminal B                   | 2       | 1       | 0       |
| BC85       | F   | 44     | breast cancer | +  | +  | -    | 50%  | Luminal B                   | 1       | 1       | 0       |
| BC86       | F   | 64     | breast cancer | +  | -  | +    | 40%  | Luminal B                   | 2       | 2       | 0       |
| BC87       | F   | 49     | breast cancer | -  | -  | -    | 40%  | TNBC                        | 2       | 1       | 0       |
| BC88       | F   | 63     | breast cancer | +  | +  | -    | 5%   | Luminal A                   | 1       | 1       | 0       |
| BC89       | F   | 66     | breast cancer | +  | +  | -    | 10%  | Luminal A                   | 2       | 2       | 0       |
| BC90       | F   | 70     | breast cancer | +  | +  | -    | 15%  | Luminal B                   | 2       | 0       | 0       |
| BC91       | F   | 55     | breast cancer | +  | +  | -    | 15%  | Luminal B                   | 1       | 1       | 0       |
| BC92       | F   | 60     | breast cancer | -  | -  | -    | 70%  | TNBC                        | 2       | 0       | 0       |
| BC93       | F   | 50     | breast cancer | -  | -  | -    | 40%  | TNBC                        | 2       | 0       | 0       |
| BC94       | F   | 52     | breast cancer | +  | -  | -    | 10%  | Luminal A                   | 2       | 0       | 0       |
| BC95       | F   | 47     | breast cancer | +  | +  | -    | 10%  | Luminal A                   | 2       | 1       | 0       |
| BC96       | F   | 58     | breast cancer | +  | -  | -    | 60%  | Luminal B                   | 1       | 0       | 0       |
| BC97       | F   | 63     | breast cancer | -  | -  | +    | 10%  | HER2                        | 1       | 0       | 0       |
| BC98       | F   | 62     | breast cancer | +  | +  | -    | 30%  | Luminal B                   | 1       | 1       | 0       |
| BC99       | F   | 56     | breast cancer | +  | +  | -    | 30%  | Luminal B                   | 1       | 0       | 0       |
| BC100      | F   | 42     | breast cancer | -  | -  | +    | 70%  | HER2                        | 2       | 0       | 0       |
| BC101      | F   | 72     | breast cancer | -  | -  | -    | 10%  | TNBC                        | 2       | 1       | 0       |
| BC102      | F   | 57     | breast cancer | -  | -  | +    | 70%  | HER2                        | 1       | 0       | 0       |
| BC103      | F   | 59     | breast cancer | -  | -  | +    | 20%  | HER2                        | 1       | 0       | 0       |
| BC104      | F   | 45     | breast cancer | +  | +  | +    | 50%  | Luminal B                   | 2       | 0       | 0       |
| BC105      | F   | 70     | breast cancer | +  | -  | +    | 30%  | Luminal B                   | 1       | 0       | 0       |
| BC106      | F   | 51     | breast cancer | +  | -  | +    | 40%  | Luminal B                   | 2       | 1       | 0       |
| BC107      | F   | 51     | breast cancer | +  | +  | -    | 40%  | Luminal B                   | 2       | 1       | 0       |
| BC108      | F   | 41     | breast cancer | +  | +  | -    | 30%  | Luminal B                   | 1       | 2       | 0       |
| BC109      | F   | 41     | breast cancer | +  | +  | -    | 30%  | Luminal B                   | 2       | 0       | 0       |
| BC110      | F   | 41     | breast cancer | +  | +  | -    | 40%  | Luminal B                   | 1       | 2       | 0       |
| BC111      | F   | 60     | breast cancer | +  | +  | -    | 10%  | Luminal A                   | 1       | 1       | 0       |
| BC112      | F   | 47     | breast cancer | -  | -  | +    | 80%  | HER2                        | 1       | 1       | 0       |
| BC113      | F   | 55     | breast cancer | +  | +  | -    | 20%  | Luminal B                   | 2       | 1       | 0       |
| BC114      | F   | 72     | breast cancer | +  | +  | -    | 10%  | Luminal A                   | 1       | 0       | 0       |
| BC115      | F   | 46     | breast cancer | +  | +  | -    | 10%  | Luminal A                   | 2       | 0       | 0       |

|       |   |    |               |   |   |   |     |           |   |   |   |
|-------|---|----|---------------|---|---|---|-----|-----------|---|---|---|
| BC116 | F | 48 | breast cancer | - | - | - | 40% | TNBC      | 1 | 0 | 0 |
| BC117 | F | 28 | breast cancer | - | - | + | 50% | HER2      | 2 | 0 | 0 |
| BC118 | F | 55 | breast cancer | - | - | + | 60% | HER2      | 2 | 1 | 0 |
| BC119 | F | 47 | breast cancer | + | + | - | 80% | Luminal B | 2 | 1 | 0 |
| BC120 | F | 55 | breast cancer | + | + | - | 10% | Luminal A | 1 | 1 | 0 |
| BC121 | F | 58 | breast cancer | + | + | + | 40% | Luminal B | 1 | 0 | 0 |
| BC122 | F | 47 | breast cancer | + | + | - | 20% | Luminal B | 2 | 1 | 0 |
| BC123 | F | 60 | breast cancer | - | - | - | 80% | TNBC      | 2 | 0 | 0 |
| BC124 | F | 45 | breast cancer | - | - | + | 30% | HER2      | 1 | 0 | 0 |
| BC125 | F | 45 | breast cancer | + | + | + | 30% | Luminal B | 1 | 1 | 0 |
| BC126 | F | 32 | breast cancer | - | - | - | 70% | TNBC      | 2 | 1 | 0 |
| BC127 | F | 76 | breast cancer | + | + | - | 5%  | Luminal A | 2 | 0 | 0 |
| BC128 | F | 72 | breast cancer | + | + | - | 20% | Luminal B | 1 | 0 | 0 |
| BC129 | F | 45 | breast cancer | + | + | - | 20% | Luminal B | 1 | 0 | 0 |
| BC130 | F | 49 | breast cancer | + | + | - | 20% | Luminal B | 1 | 0 | 0 |
| BC131 | F | 53 | breast cancer | + | + | - | 10% | Luminal A | 1 | 0 | 0 |
| BC132 | F | 55 | breast cancer | + | - | + | 40% | Luminal B | 2 | 1 | 0 |
| BC133 | F | 43 | breast cancer | + | + | - | 20% | Luminal B | 1 | 1 | 0 |
| BC134 | F | 50 | breast cancer | - | - | - | 20% | TNBC      | 2 | 0 | 0 |
| BC135 | F | 39 | breast cancer | - | - | - | 50% | TNBC      | 1 | 0 | 0 |
| BC136 | F | 57 | breast cancer | - | - | + | 30% | HER2      | 1 | 1 | 0 |
| BC137 | F | 47 | breast cancer | - | - | + | 30% | HER2      | 2 | 1 | 0 |
| BC138 | F | 54 | breast cancer | + | + | - | 20% | Luminal B | 1 | 1 | 0 |
| BC139 | F | 28 | breast cancer | + | + | + | 40% | Luminal B | 4 | 1 | 0 |
| BC140 | F | 62 | breast cancer | + | + | - | 80% | Luminal B | 2 | 2 | 0 |
| BC141 | F | 73 | breast cancer | + | + | - | 30% | Luminal B | 1 | 0 | 0 |
| BC142 | F | 50 | breast cancer | + | + | + | 5%  | Luminal B | 2 | 0 | 0 |
| BC143 | F | 78 | breast cancer | + | + | - | 10% | Luminal A | 1 | 0 | 0 |
| BC144 | F | 69 | breast cancer | + | + | - | 10% | Luminal A | 1 | 0 | 0 |
| BC145 | F | 58 | breast cancer | - | - | + | 50% | HER2      | 2 | 0 | 0 |
| BC146 | F | 43 | breast cancer | + | + | - | 10% | Luminal A | 1 | 0 | 0 |
| BC147 | F | 55 | breast cancer | + | + | - | 10% | Luminal A | 2 | 0 | 0 |
| BC148 | F | 48 | breast cancer | + | + | - | 15% | Luminal B | 2 | 0 | 0 |
| BC149 | F | 53 | breast cancer | - | - | + | 40% | HER2      | 2 | 1 | 0 |
| BC150 | F | 50 | breast cancer | + | + | + | 50% | Luminal B | 2 | 0 | 0 |
| BC151 | F | 48 | breast cancer | + | + | - | 60% | Luminal B | 2 | 0 | 0 |
| BC152 | F | 35 | breast cancer | + | + | - | 60% | Luminal B | 2 | 1 | 0 |
| BC153 | F | 56 | breast cancer | + | + | + | 50% | Luminal B | 1 | 1 | 0 |

|       |   |    |               |   |   |   |     |           |   |   |   |
|-------|---|----|---------------|---|---|---|-----|-----------|---|---|---|
| BC154 | F | 60 | breast cancer | - | - | + | 30% | HER2      | 1 | 1 | 0 |
| BC155 | F | 63 | breast cancer | + | + | - | 30% | Luminal B | 1 | 0 | 0 |
| BC156 | F | 68 | breast cancer | + | + | - | 10% | Luminal A | 1 | 0 | 0 |
| BC157 | F | 75 | breast cancer | + | + | - | 15% | Luminal B | 1 | 0 | 0 |
| BC158 | F | 75 | breast cancer | - | + | + | 45% | Luminal B | 2 | 1 | 0 |
| BC159 | F | 56 | breast cancer | + | - | - | 60% | Luminal B | 1 | 1 | 0 |
| BC160 | F | 56 | breast cancer | - | - | + | 40% | HER2      | 1 | 1 | 0 |
| BC161 | F | 55 | breast cancer | + | + | - | 5%  | Luminal A | 1 | 0 | 0 |
| BC162 | F | 67 | breast cancer | + | - | + | 15% | Luminal B | 2 | 1 | 0 |
| BC163 | F | 50 | breast cancer | - | - | - | 80% | TNBC      | 1 | 0 | 0 |
| BC164 | F | 60 | breast cancer | - | - | + | 30% | HER2      | 2 | 0 | 0 |
| BC165 | F | 42 | breast cancer | - | - | - | 30% | TNBC      | 1 | 0 | 0 |
| BC166 | F | 59 | breast cancer | - | - | + | 5%  | HER2      | 1 | 0 | 0 |
| BC167 | F | 56 | breast cancer | + | + | - | 10% | Luminal A | 1 | 0 | 0 |
| BC168 | F | 59 | breast cancer | + | + | - | 30% | Luminal B | 1 | 1 | 0 |
| BC169 | F | 57 | breast cancer | + | + | - | 30% | Luminal B | 2 | 1 | 0 |
| BC170 | F | 61 | breast cancer | - | - | - | 20% | TNBC      | 3 | 1 | 0 |
| BC171 | F | 63 | breast cancer | - | - | - | 15% | TNBC      | 2 | 1 | 0 |
| BC172 | F | 64 | breast cancer | + | + | - | 10% | Luminal A | 2 | 0 | 0 |
| BC173 | F | 34 | breast cancer | + | - | - | 15% | Luminal B | 2 | 1 | 0 |
| BC174 | F | 47 | breast cancer | + | + | - | 10% | Luminal A | 2 | 0 | 0 |
| BC175 | F | 66 | breast cancer | + | + | - | 8%  | Luminal A | 1 | 1 | 0 |
| BC176 | F | 55 | breast cancer | - | - | + | 30% | HER2      | 2 | 0 | 0 |
| BC177 | F | 66 | breast cancer | + | + | + | 10% | Luminal B | 2 | 1 | 0 |
| BC178 | F | 51 | breast cancer | - | - | - | 20% | TNBC      | 2 | 2 | 0 |
| BC179 | F | 71 | breast cancer | + | + | - | 5%  | Luminal A | 1 | 0 | 0 |
| BC180 | F | 43 | breast cancer | + | + | - | 10% | Luminal A | 2 | 1 | 0 |
| BC181 | F | 40 | breast cancer | - | - | - | 40% | TNBC      | 1 | 0 | 0 |
| BC182 | F | 48 | breast cancer | - | - | - | 10% | TNBC      | 2 | 0 | 0 |
| BC183 | F | 55 | breast cancer | + | + | - | 30% | Luminal B | 1 | 1 | 0 |
| BC184 | F | 65 | breast cancer | - | - | + | 30% | HER2      | 2 | 1 | 0 |
| BC185 | F | 63 | breast cancer | + | + | - | 5%  | Luminal A | 1 | 0 | 0 |
| BC186 | F | 51 | breast cancer | - | - | + | 60% | HER2      | 2 | 2 | 0 |
| BC187 | F | 66 | breast cancer | + | + | - | 10% | Luminal A | 1 | 0 | 0 |
| BC188 | F | 38 | breast cancer | - | - | - | 70% | TNBC      | 2 | 0 | 0 |
| BC189 | F | 38 | breast cancer | - | - | - | 65% | TNBC      | 2 | 2 | 0 |
| BC190 | F | 51 | breast cancer | + | + | - | 30% | Luminal B | 2 | 1 | 0 |
| BC191 | F | 59 | breast cancer | - | - | + | 15% | HER2      | 2 | 0 | 0 |

|       |   |    |                     |   |   |   |     |           |   |   |   |
|-------|---|----|---------------------|---|---|---|-----|-----------|---|---|---|
| BC192 | F | 39 | breast cancer       | + | + | - | 10% | Luminal A | 1 | 0 | 0 |
| BC193 | F | 43 | breast cancer       | + | + | + | 30% | Luminal B | 2 | 1 | 0 |
| BC194 | F | 65 | breast cancer       | + | - | + | 30% | Luminal B | 2 | 1 | 0 |
| BC195 | F | 47 | breast cancer       | + | + | - | 40% | Luminal B | 2 | 0 | 0 |
| BC196 | F | 41 | breast cancer       | + | + | - | 40% | Luminal B | 2 | 1 | 0 |
| BC197 | F | 68 | breast cancer       | + | + | - | 8%  | Luminal A | 1 | 1 | 0 |
| BC198 | F | 51 | breast cancer       | + | + | - | 40% | Luminal B | 2 | 1 | 0 |
| BC199 | F | 73 | breast cancer       | + | + | - | 2%  | Luminal A | 1 | 1 | 0 |
| BC200 | F | 47 | breast cancer       | - | - | + | 20% | HER2      | 1 | 1 | 0 |
| BN1   | F | 57 | breast fibroadenoma |   |   |   |     |           |   |   |   |
| BN2   | F | 37 | breast fibroadenoma |   |   |   |     |           |   |   |   |
| BN3   | F | 46 | breast fibroadenoma |   |   |   |     |           |   |   |   |
| BN4   | F | 41 | breast fibroadenoma |   |   |   |     |           |   |   |   |
| BN5   | F | 33 | breast fibroadenoma |   |   |   |     |           |   |   |   |
| BN6   | F | 45 | breast fibroadenoma |   |   |   |     |           |   |   |   |
| BN7   | F | 51 | breast fibroadenoma |   |   |   |     |           |   |   |   |
| BN8   | F | 57 | breast fibroadenoma |   |   |   |     |           |   |   |   |
| BN9   | F | 52 | breast fibroadenoma |   |   |   |     |           |   |   |   |
| BN10  | F | 56 | breast fibroadenoma |   |   |   |     |           |   |   |   |
| BN11  | F | 54 | breast fibroadenoma |   |   |   |     |           |   |   |   |
| BN12  | F | 43 | breast fibroadenoma |   |   |   |     |           |   |   |   |
| BN13  | F | 81 | breast fibroadenoma |   |   |   |     |           |   |   |   |
| BN14  | F | 62 | breast fibroadenoma |   |   |   |     |           |   |   |   |
| BN15  | F | 43 | breast fibroadenoma |   |   |   |     |           |   |   |   |
| BN16  | F | 60 | breast fibroadenoma |   |   |   |     |           |   |   |   |
| BN17  | F | 59 | breast fibroadenoma |   |   |   |     |           |   |   |   |
| BN18  | F | 60 | breast fibroadenoma |   |   |   |     |           |   |   |   |
| BN19  | F | 28 | breast fibroadenoma |   |   |   |     |           |   |   |   |
| BN20  | F | 26 | breast fibroadenoma |   |   |   |     |           |   |   |   |
| BN21  | F | 55 | breast fibroadenoma |   |   |   |     |           |   |   |   |
| BN22  | F | 69 | breast fibroadenoma |   |   |   |     |           |   |   |   |
| BN23  | F | 52 | breast fibroadenoma |   |   |   |     |           |   |   |   |
| BN24  | F | 24 | breast fibroadenoma |   |   |   |     |           |   |   |   |
| BN25  | F | 46 | breast fibroadenoma |   |   |   |     |           |   |   |   |
| BN26  | F | 48 | breast fibroadenoma |   |   |   |     |           |   |   |   |
| BN27  | F | 42 | breast fibroadenoma |   |   |   |     |           |   |   |   |
| BN28  | F | 52 | breast fibroadenoma |   |   |   |     |           |   |   |   |
| BN29  | F | 73 | breast fibroadenoma |   |   |   |     |           |   |   |   |

|      |   |    |                     |  |  |  |  |  |  |  |  |  |  |  |  |  |  |  |  |  |
|------|---|----|---------------------|--|--|--|--|--|--|--|--|--|--|--|--|--|--|--|--|--|
| BN30 | F | 53 | breast fibroadenoma |  |  |  |  |  |  |  |  |  |  |  |  |  |  |  |  |  |
| BN31 | F | 43 | breast fibroadenoma |  |  |  |  |  |  |  |  |  |  |  |  |  |  |  |  |  |
| BN32 | F | 58 | breast fibroadenoma |  |  |  |  |  |  |  |  |  |  |  |  |  |  |  |  |  |
| BN33 | F | 46 | breast fibroadenoma |  |  |  |  |  |  |  |  |  |  |  |  |  |  |  |  |  |
| BN34 | F | 51 | breast fibroadenoma |  |  |  |  |  |  |  |  |  |  |  |  |  |  |  |  |  |
| BN35 | F | 42 | breast fibroadenoma |  |  |  |  |  |  |  |  |  |  |  |  |  |  |  |  |  |
| BN36 | F | 53 | breast fibroadenoma |  |  |  |  |  |  |  |  |  |  |  |  |  |  |  |  |  |
| BN37 | F | 46 | breast fibroadenoma |  |  |  |  |  |  |  |  |  |  |  |  |  |  |  |  |  |
| BN38 | F | 28 | breast fibroadenoma |  |  |  |  |  |  |  |  |  |  |  |  |  |  |  |  |  |
| BN39 | F | 39 | breast fibroadenoma |  |  |  |  |  |  |  |  |  |  |  |  |  |  |  |  |  |
| BN40 | F | 43 | breast fibroadenoma |  |  |  |  |  |  |  |  |  |  |  |  |  |  |  |  |  |
| BN41 | F | 43 | breast fibroadenoma |  |  |  |  |  |  |  |  |  |  |  |  |  |  |  |  |  |
| BN42 | F | 57 | breast fibroadenoma |  |  |  |  |  |  |  |  |  |  |  |  |  |  |  |  |  |
| BN43 | F | 40 | breast fibroadenoma |  |  |  |  |  |  |  |  |  |  |  |  |  |  |  |  |  |
| BN44 | F | 53 | breast fibroadenoma |  |  |  |  |  |  |  |  |  |  |  |  |  |  |  |  |  |
| BN45 | F | 41 | breast fibroadenoma |  |  |  |  |  |  |  |  |  |  |  |  |  |  |  |  |  |
| BN46 | F | 49 | breast fibroadenoma |  |  |  |  |  |  |  |  |  |  |  |  |  |  |  |  |  |
| BN47 | F | 49 | breast fibroadenoma |  |  |  |  |  |  |  |  |  |  |  |  |  |  |  |  |  |
| BN48 | F | 47 | breast fibroadenoma |  |  |  |  |  |  |  |  |  |  |  |  |  |  |  |  |  |
| BN49 | F | 51 | breast fibroadenoma |  |  |  |  |  |  |  |  |  |  |  |  |  |  |  |  |  |
| BN50 | F | 35 | breast fibroadenoma |  |  |  |  |  |  |  |  |  |  |  |  |  |  |  |  |  |
| BN51 | F | 32 | breast fibroadenoma |  |  |  |  |  |  |  |  |  |  |  |  |  |  |  |  |  |
| BN52 | F | 31 | breast fibroadenoma |  |  |  |  |  |  |  |  |  |  |  |  |  |  |  |  |  |
| BN53 | F | 46 | breast fibroadenoma |  |  |  |  |  |  |  |  |  |  |  |  |  |  |  |  |  |
| BN54 | F | 56 | breast fibroadenoma |  |  |  |  |  |  |  |  |  |  |  |  |  |  |  |  |  |
| BN55 | F | 41 | breast fibroadenoma |  |  |  |  |  |  |  |  |  |  |  |  |  |  |  |  |  |
| BN56 | F | 38 | breast fibroadenoma |  |  |  |  |  |  |  |  |  |  |  |  |  |  |  |  |  |
| BN57 | F | 45 | breast fibroadenoma |  |  |  |  |  |  |  |  |  |  |  |  |  |  |  |  |  |
| BN58 | F | 31 | breast fibroadenoma |  |  |  |  |  |  |  |  |  |  |  |  |  |  |  |  |  |
| BN59 | F | 49 | breast fibroadenoma |  |  |  |  |  |  |  |  |  |  |  |  |  |  |  |  |  |
| BN60 | F | 47 | breast fibroadenoma |  |  |  |  |  |  |  |  |  |  |  |  |  |  |  |  |  |
| BN61 | F | 47 | breast fibroadenoma |  |  |  |  |  |  |  |  |  |  |  |  |  |  |  |  |  |
| BN62 | F | 40 | breast fibroadenoma |  |  |  |  |  |  |  |  |  |  |  |  |  |  |  |  |  |
| BN63 | F | 22 | breast fibroadenoma |  |  |  |  |  |  |  |  |  |  |  |  |  |  |  |  |  |
| BN64 | F | 53 | breast fibroadenoma |  |  |  |  |  |  |  |  |  |  |  |  |  |  |  |  |  |
| BN65 | F | 39 | breast fibroadenoma |  |  |  |  |  |  |  |  |  |  |  |  |  |  |  |  |  |
| BN66 | F | 43 | breast fibroadenoma |  |  |  |  |  |  |  |  |  |  |  |  |  |  |  |  |  |
| BN67 | F | 26 | breast fibroadenoma |  |  |  |  |  |  |  |  |  |  |  |  |  |  |  |  |  |

|      |   |    |                     |  |  |  |  |  |  |  |  |  |  |
|------|---|----|---------------------|--|--|--|--|--|--|--|--|--|--|
| BN68 | F | 42 | breast fibroadenoma |  |  |  |  |  |  |  |  |  |  |
| BN69 | F | 37 | breast fibroadenoma |  |  |  |  |  |  |  |  |  |  |
| BN70 | F | 44 | breast fibroadenoma |  |  |  |  |  |  |  |  |  |  |
| BN71 | F | 37 | breast fibroadenoma |  |  |  |  |  |  |  |  |  |  |
| BN72 | F | 42 | breast fibroadenoma |  |  |  |  |  |  |  |  |  |  |
| BN73 | F | 43 | breast fibroadenoma |  |  |  |  |  |  |  |  |  |  |
| BN74 | F | 49 | breast fibroadenoma |  |  |  |  |  |  |  |  |  |  |
| BN75 | F | 42 | breast fibroadenoma |  |  |  |  |  |  |  |  |  |  |
| BN76 | F | 44 | breast fibroadenoma |  |  |  |  |  |  |  |  |  |  |
| BN77 | F | 61 | breast fibroadenoma |  |  |  |  |  |  |  |  |  |  |
| BN78 | F | 59 | breast fibroadenoma |  |  |  |  |  |  |  |  |  |  |
| BN79 | F | 63 | breast fibroadenoma |  |  |  |  |  |  |  |  |  |  |
| BN80 | F | 42 | breast fibroadenoma |  |  |  |  |  |  |  |  |  |  |
| BN81 | F | 32 | breast fibroadenoma |  |  |  |  |  |  |  |  |  |  |
| BN82 | F | 54 | breast fibroadenoma |  |  |  |  |  |  |  |  |  |  |
| BN83 | F | 40 | breast fibroadenoma |  |  |  |  |  |  |  |  |  |  |
| BN84 | F | 29 | breast fibroadenoma |  |  |  |  |  |  |  |  |  |  |
| BN85 | F | 39 | breast fibroadenoma |  |  |  |  |  |  |  |  |  |  |
| BN86 | F | 47 | breast fibroadenoma |  |  |  |  |  |  |  |  |  |  |
| BN87 | F | 36 | breast fibroadenoma |  |  |  |  |  |  |  |  |  |  |
