# Supplementary material for: Aged neutrophils form mitochondria-dependent vital NETs to promote breast cancer lung metastasis
Source: PubMed Central journal article supplement — J Immunother Cancer. 2021 Oct 24;9(10):e002875. doi: 10.1136/jitc-2021-002875 (PMC8559246; doi:10.1136/jitc-2021-002875), 2021-10-24
Supplement: jitc-2021-002875supp014.pdf [file jitc-2021-002875supp014.pdf]

**Table S3. Clinico-pathological characteristics of patients included in this study (Fig. 7g and S7i)**

| Patient ID | Sex | Age(y) | Diagnosis     | ER | PR | HER2 | Ki67 | Histological classification | T stage | N stage | M stage | TNM  |
|------------|-----|--------|---------------|----|----|------|------|-----------------------------|---------|---------|---------|------|
| BC1        | F   | 57     | breast cancer | -  | -  | +    | 20%  | HER2                        | 2       | 1       | 0       | IIB  |
| BC2        | F   | 71     | breast cancer | -  | -  | +    | 30%  | HER2                        | 2       | 2       | 0       | IIIA |
| BC3        | F   | 69     | breast cancer | -  | -  | +    | 30%  | HER2                        | 1       | 0       | 0       | IA   |
| BC4        | F   | 48     | breast cancer | -  | -  | +    | 40%  | HER2                        | 1       | 1       | 0       | IIA  |
| BC5        | F   | 52     | breast cancer | -  | -  | +    | 20%  | HER2                        | 2       | 0       | 0       | IIA  |
| BC6        | F   | 59     | breast cancer | -  | -  | +    | 60%  | HER2                        | 1       | 0       | 0       | IA   |
| BC7        | F   | 62     | breast cancer | -  | -  | +    | 20%  | HER2                        | 2       | 0       | 0       | IIA  |
| BC8        | F   | 38     | breast cancer | -  | -  | +    | 20%  | HER2                        | 4       | 0       | 0       | IIIB |
| BC9        | F   | 53     | breast cancer | -  | -  | +    | 70%  | HER2                        | 1       | 0       | 0       | IA   |
| BC10       | F   | 57     | breast cancer | -  | -  | +    | 30%  | HER2                        | 2       | 1       | 0       | IIB  |
| BC11       | F   | 67     | breast cancer | -  | -  | +    | 40%  | HER2                        | 1       | 2       | 0       | IIIA |
| BC12       | F   | 61     | breast cancer | -  | -  | +    | 80%  | HER2                        | 2       | 2       | 0       | IIIA |
| BC13       | F   | 57     | breast cancer | -  | -  | +    | 20%  | HER2                        | 1       | 1       | 0       | IIA  |
| BC14       | F   | 54     | breast cancer | -  | -  | +    | 10%  | HER2                        | 2       | 0       | 0       | IIA  |
| BC15       | F   | 51     | breast cancer | -  | -  | +    | 80%  | HER2                        | 1       | 0       | 0       | IA   |
| BC16       | F   | 57     | breast cancer | -  | -  | +    | 15%  | HER2                        | 1       | 0       | 0       | IA   |
| BC17       | F   | 62     | breast cancer | -  | -  | +    | 30%  | HER2                        | 2       | 1       | 0       | IIB  |
| BC18       | F   | 57     | breast cancer | -  | -  | +    | 40%  | HER2                        | 1       | 1       | 0       | IIA  |
| BC19       | F   | 62     | breast cancer | -  | -  | +    | 15%  | HER2                        | 1       | 1       | 0       | IIA  |
| BC20       | F   | 64     | breast cancer | -  | -  | +    | 20%  | HER2                        | 2       | 0       | 0       | IIA  |
| BC21       | F   | 48     | breast cancer | +  | +  | -    | 10%  | Luminal A                   | 3       | 1       | 0       | IIIA |
| BC22       | F   | 62     | breast cancer | +  | -  | -    | 5%   | Luminal A                   | 1       | 0       | 0       | IA   |
| BC23       | F   | 90     | breast cancer | +  | +  | -    | 5%   | Luminal A                   | 2       | 0       | 0       | IIA  |
| BC24       | F   | 65     | breast cancer | +  | +  | -    | 10%  | Luminal A                   | 2       | 0       | 0       | IIA  |
| BC25       | F   | 69     | breast cancer | +  | +  | -    | 5%   | Luminal A                   | 1       | 0       | 0       | IA   |
| BC26       | F   | 64     | breast cancer | +  | -  | -    | 5%   | Luminal A                   | 2       | 0       | 0       | IIA  |
| BC27       | F   | 79     | breast cancer | +  | +  | -    | 10%  | Luminal A                   | 1       | 0       | 0       | IA   |
| BC28       | F   | 33     | breast cancer | +  | +  | -    | 10%  | Luminal A                   | 1       | 2       | 0       | IIIA |
| BC29       | F   | 72     | breast cancer | +  | +  | -    | 5%   | Luminal A                   | 2       | 0       | 0       | IIA  |
| BC30       | F   | 55     | breast cancer | +  | +  | -    | 0%   | Luminal A                   | 1       | 1       | 0       | IIA  |
| BC31       | F   | 49     | breast cancer | +  | +  | -    | 10%  | Luminal A                   | 1       | 1       | 0       | IIA  |
| BC32       | F   | 46     | breast cancer | +  | -  | -    | 15%  | Luminal A                   | 1       | 0       | 0       | IA   |
| BC33       | F   | 48     | breast cancer | +  | +  | -    | 10%  | Luminal A                   | 1       | 1       | 0       | IIA  |
| BC34       | F   | 50     | breast cancer | +  | +  | -    | 15%  | Luminal A                   | 1       | 0       | 0       | IA   |
| BC35       | F   | 53     | breast cancer | +  | +  | -    | 5%   | Luminal A                   | 1       | 1       | 0       | IIA  |

|      |   |    |               |   |   |   |     |           |   |   |   |      |
|------|---|----|---------------|---|---|---|-----|-----------|---|---|---|------|
| BC36 | F | 71 | breast cancer | + | + | - | 5%  | Luminal A | 1 | 2 | 0 | IIIA |
| BC37 | F | 63 | breast cancer | + | - | - | 10% | Luminal A | 2 | 0 | 0 | IIA  |
| BC38 | F | 71 | breast cancer | + | + | - | 10% | Luminal A | 2 | 1 | 0 | IIB  |
| BC39 | F | 75 | breast cancer | + | + | - | 5%  | Luminal A | 0 | 1 | 0 | IIA  |
| BC40 | F | 50 | breast cancer | + | - | - | 5%  | Luminal A | 0 | 2 | 0 | IIIA |
| BC41 | F | 68 | breast cancer | + | + | + | 20% | Luminal B | 2 | 2 | 0 | IIIA |
| BC42 | F | 65 | breast cancer | + | - | - | 15% | Luminal B | 1 | 0 | 0 | IA   |
| BC43 | F | 46 | breast cancer | + | + | + | 30% | Luminal B | 1 | 0 | 0 | IA   |
| BC44 | F | 64 | breast cancer | + | - | + | 10% | Luminal B | 1 | 1 | 0 | IIA  |
| BC45 | F | 71 | breast cancer | + | - | + | 5%  | Luminal B | 1 | 0 | 0 | IA   |
| BC46 | F | 49 | breast cancer | + | + | + | 20% | Luminal B | 2 | 2 | 0 | IIIA |
| BC47 | F | 56 | breast cancer | + | + | - | 80% | Luminal B | 2 | 2 | 0 | IIIA |
| BC48 | F | 67 | breast cancer | + | - | + | 10% | Luminal B | 2 | 1 | 0 | IIB  |
| BC49 | F | 38 | breast cancer | + | + | - | 15% | Luminal B | 2 | 1 | 0 | IIB  |
| BC50 | F | 66 | breast cancer | + | + | + | 40% | Luminal B | 2 | 2 | 0 | IIIA |
| BC51 | F | 55 | breast cancer | + | + | - | 30% | Luminal B | 1 | 0 | 0 | IA   |
| BC52 | F | 54 | breast cancer | + | + | - | 20% | Luminal B | 1 | 0 | 0 | IA   |
| BC53 | F | 68 | breast cancer | + | + | + | 20% | Luminal B | 1 | 0 | 0 | IA   |
| BC54 | F | 75 | breast cancer | + | - | - | 30% | Luminal B | 2 | 0 | 0 | IIA  |
| BC55 | F | 63 | breast cancer | + | + | + | 20% | Luminal B | 1 | 0 | 0 | IA   |
| BC56 | F | 72 | breast cancer | + | - | + | 20% | Luminal B | 2 | 0 | 0 | IIA  |
| BC57 | F | 65 | breast cancer | + | + | - | 50% | Luminal B | 2 | 0 | 0 | IIA  |
| BC58 | F | 36 | breast cancer | + | - | + | 30% | Luminal B | 1 | 1 | 0 | IIA  |
| BC59 | F | 50 | breast cancer | + | + | - | 40% | Luminal B | 2 | 1 | 0 | IIB  |
| BC60 | F | 53 | breast cancer | + | + | + | 15% | Luminal B | 2 | 2 | 0 | IIIA |
| BC61 | F | 53 | breast cancer | - | - | - | 20% | TNBC      | 1 | 1 | 0 | IIA  |
| BC62 | F | 40 | breast cancer | - | - | - | 70% | TNBC      | 1 | 0 | 0 | IA   |
| BC63 | F | 44 | breast cancer | - | - | - | 40% | TNBC      | 1 | 3 | 0 | IV   |
| BC64 | F | 51 | breast cancer | - | - | - | 70% | TNBC      | 2 | 0 | 1 | IIA  |
| BC65 | F | 50 | breast cancer | - | - | - | 70% | TNBC      | 2 | 0 | 0 | IIA  |
| BC66 | F | 51 | breast cancer | - | - | - | 15% | TNBC      | 1 | 0 | 0 | IA   |
| BC67 | F | 62 | breast cancer | - | - | - | 30% | TNBC      | 1 | 0 | 0 | IA   |
| BC68 | F | 38 | breast cancer | - | - | - | 10% | TNBC      | 1 | 1 | 0 | IIA  |
| BC69 | F | 35 | breast cancer | - | - | - | 70% | TNBC      | 2 | 0 | 0 | IIA  |
| BC70 | F | 74 | breast cancer | - | - | - | 30% | TNBC      | 2 | 0 | 0 | IIA  |
| BC71 | F | 52 | breast cancer | - | - | - | 60% | TNBC      | 1 | 1 | 0 | IIA  |
| BC72 | F | 32 | breast cancer | - | - | - | 40% | TNBC      | 1 | 0 | 0 | IA   |
| BC73 | F | 76 | breast cancer | - | - | - | 5%  | TNBC      | 3 | 3 | 0 | IIIC |

|      |   |    |                     |   |   |   |     |      |   |   |   |      |
|------|---|----|---------------------|---|---|---|-----|------|---|---|---|------|
| BC74 | F | 64 | breast cancer       | - | - | - | 60% | TNBC | 2 | 3 | 0 | IIC  |
| BC75 | F | 81 | breast cancer       | - | - | - | 40% | TNBC | 2 | 2 | 0 | IIIA |
| BC76 | F | 30 | breast cancer       | - | - | - | 90% | TNBC | 2 | 2 | 0 | IIIA |
| BC77 | F | 50 | breast cancer       | - | - | - | 40% | TNBC | 2 | 0 | 0 | IIA  |
| BC78 | F | 63 | breast cancer       | - | - | - | 70% | TNBC | 1 | 1 | 0 | IIA  |
| BC79 | F | 38 | breast cancer       | - | - | - | 80% | TNBC | 1 | 0 | 0 | IA   |
| BC80 | F | 64 | breast cancer       | - | - | - | 30% | TNBC | 0 | 1 | 0 | IIA  |
| BN1  | F | 57 | breast fibroadenoma |   |   |   |     |      |   |   |   |      |
| BN2  | F | 37 | breast fibroadenoma |   |   |   |     |      |   |   |   |      |
| BN3  | F | 46 | breast fibroadenoma |   |   |   |     |      |   |   |   |      |
| BN4  | F | 41 | breast fibroadenoma |   |   |   |     |      |   |   |   |      |
| BN5  | F | 33 | breast fibroadenoma |   |   |   |     |      |   |   |   |      |
| BN6  | F | 45 | breast fibroadenoma |   |   |   |     |      |   |   |   |      |
| BN7  | F | 51 | breast fibroadenoma |   |   |   |     |      |   |   |   |      |
| BN8  | F | 57 | breast fibroadenoma |   |   |   |     |      |   |   |   |      |
| BN9  | F | 52 | breast fibroadenoma |   |   |   |     |      |   |   |   |      |
| BN10 | F | 56 | breast fibroadenoma |   |   |   |     |      |   |   |   |      |
| BN11 | F | 54 | breast fibroadenoma |   |   |   |     |      |   |   |   |      |
| BN12 | F | 43 | breast fibroadenoma |   |   |   |     |      |   |   |   |      |
| BN13 | F | 81 | breast fibroadenoma |   |   |   |     |      |   |   |   |      |
| BN14 | F | 62 | breast fibroadenoma |   |   |   |     |      |   |   |   |      |
| BN15 | F | 43 | breast fibroadenoma |   |   |   |     |      |   |   |   |      |
| BN16 | F | 60 | breast fibroadenoma |   |   |   |     |      |   |   |   |      |
| BN17 | F | 59 | breast fibroadenoma |   |   |   |     |      |   |   |   |      |
| BN18 | F | 60 | breast fibroadenoma |   |   |   |     |      |   |   |   |      |
| BN19 | F | 28 | breast fibroadenoma |   |   |   |     |      |   |   |   |      |
| BN20 | F | 26 | breast fibroadenoma |   |   |   |     |      |   |   |   |      |
