# Supplementary material for: Aged neutrophils form mitochondria-dependent vital NETs to promote breast cancer lung metastasis
Source: PubMed Central journal article supplement — J Immunother Cancer. 2021 Oct 24;9(10):e002875. doi: 10.1136/jitc-2021-002875 (PMC8559246; doi:10.1136/jitc-2021-002875), 2021-10-24
Supplement: jitc-2021-002875supp015.pdf [file jitc-2021-002875supp015.pdf]

**Table S4. Clinico-pathological characteristics of patients included in this study(Fig. 2d, 2e)**

| Patient ID | Sex | Age(y) | Surgery Time | Operation      | Diagnosis           | ER | PR | HER2 | Ki67 | Histological classification | T stage | N stage | M stage |
|------------|-----|--------|--------------|----------------|---------------------|----|----|------|------|-----------------------------|---------|---------|---------|
| BC201      | F   | 51     | 2004         | pneumocentesis | breast cancer       | -  | -  | -    | 50%  | TNBC                        | 2       | 1       | 1       |
| BC202      | F   | 48     | 2006         | pneumocentesis | breast cancer       | -  | -  | -    | 70%  | TNBC                        | 2       | 2       | 1       |
| BC203      | F   | 30     | 2015         | pneumocentesis | breast cancer       | -  | -  | -    | 30%  | TNBC                        | 3       | 2       | 1       |
| BC204      | F   | 26     | 2014         | pneumocentesis | breast cancer       | -  | -  | -    | 20%  | TNBC                        | 1       | 2       | 1       |
| BC205      | F   | 43     | 2013         | pneumocentesis | breast cancer       | -  | -  | -    | 40%  | TNBC                        | 1       | 1       | 1       |
| LAC1       | F   | 54     | 2019         | Segmentectomy  | lung adenocarcinoma |    |    |      |      |                             | 1       | 0       | 0       |
| LAC2       | F   | 45     | 2019         | Segmentectomy  | lung adenocarcinoma |    |    |      |      |                             | 1       | 0       | 0       |
| LAC3       | F   | 63     | 2019         | Segmentectomy  | lung adenocarcinoma |    |    |      |      |                             | 1       | 0       | 0       |
| LAC4       | F   | 57     | 2019         | Segmentectomy  | lung adenocarcinoma |    |    |      |      |                             | 1       | 0       | 0       |
| LAC5       | F   | 47     | 2019         | Segmentectomy  | lung adenocarcinoma |    |    |      |      |                             | 1       | 0       | 0       |
