# Supplementary material for: Aged neutrophils form mitochondria-dependent vital NETs to promote breast cancer lung metastasis
Source: HighWire-hosted journal article supplement (doi:10.1136/jitc-2021-002875), 2021-10-01
Supplement: jitc-2021-002875supp016_data_supplement.pdf [file jitc-2021-002875supp016_data_supplement.pdf]

## Aged neutrophils form mitochondria-dependent vital NETs to promote breast cancer lung metastasis

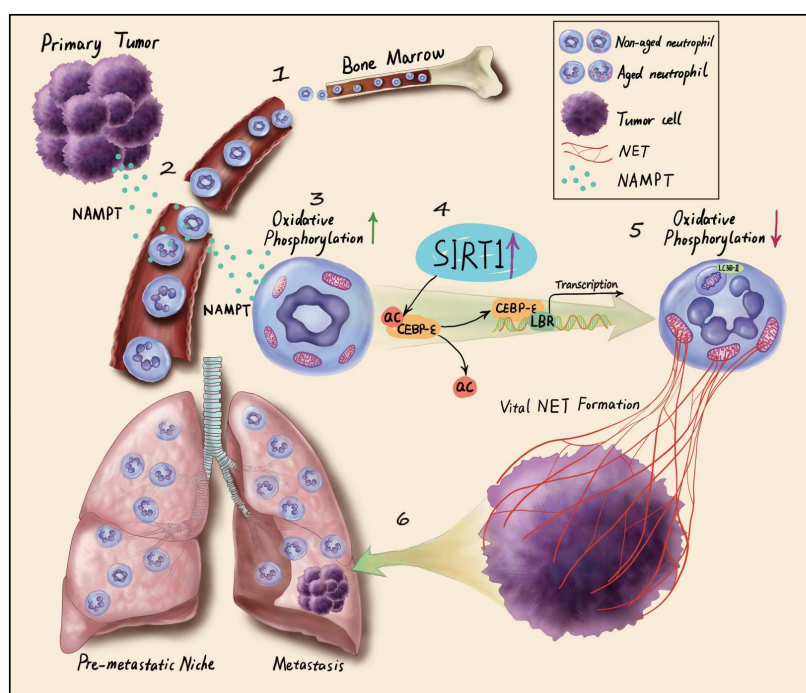

### Authors

Chenghui Yang, Zhen Wang, Lili Li, Zhigang Zhang, Jun Pan, Pin Wu, Shanshan Sun, Xiaoyan Jin, Ke Su, Fang Jia, Leyi Zhang, Haijun Wang, Xiuyan Yu, Xuan Shao, Ke Wang, Fuming Qiu, Jun Yan, Jian Huang

### Correspondence

drhuangjian@zju.edu.cn

### In Brief

By using human samples and mouse models, this article discovers a novel neutrophil subset, tumor metastasis-associated aged neutrophils (Naged), which have distinct transcriptomic characteristics and metabolic pathway, could form mitochondria-dependent vital NETs promoting breast cancer lung metastasis.
